# Supplementary material for: A Computational Model of Neuro-Glio-Vascular Loop Interactions
Source: PLoS One. 2012 Nov 20;7(11):e48802. doi: 10.1371/journal.pone.0048802 (PMC3502400; doi:10.1371/journal.pone.0048802)
Supplement: Appendix S1 — List of equations and constants. (DOCX) [file pone.0048802.s002.docx]

# APPENDIX S.A

# List of Equations

| S.A.1. Neuron |
| --- |
| 1.01 Reversal Potential of *K+* channel (Hodgkin & Huxley, 1952) |
|  |
| 1.02 Reversal Potential of *Na+* channel (Hodgkin & Huxley, 1952) |
|  |
| 1.03 Conductance of *K+* channels (Hodgkin & Huxley, 1952) |
|  |
| 1.04 Conductance of *Na*+ channels (Hodgkin & Huxley, 1952) |
|  |
| 1.05 Activity of Na+/K+ ATPase pump (Modified, Kager et al., 2000 ) |
|  |
| 1.06 *K+* current of *Na+*/*K+* ATPase pump (Kager et al., 2000) |
|  |
| 1.07 *K+* current of *Na+*/*K+* ATPase pump (Kager et al., 2000) |
|  |
|  |
| 1.08 *K+* channel current (Hodgkin & Huxley, 1952) |
|  |
| 1.09 *Na+* channel current (Hodgkin & Huxley, 1952) |
|  |
| 1.10 Total *K+* current (Kager et al., 2000) |
|  |
| 1.11 Total *Na*+ current (Kager et al., 2000) |
|  |
| 1.12 Change in [*K+*] in neuron (Kager et al., 2000) |
|  |
| 1.13 Change in [*Na+*] in neuron (Kager et al., 2000) |
|  |
| 1.14 Total ionic conductance of neuron (Hodgkin & Huxley, 1952) |
|  |
| 1.15 Steady state neuronal membrane potential |
|  |
| 1.16 Time constant for neuronal membrane potential (Hodgkin & Huxley 1952) |
|  |
| 1.17 Update rule for membrane potential (Hodgkin & Huxley 1952) |
|  |
| 1.18 Activation rate constant for gating variable *m* at membrane potential *v* (Hodgkin & Huxley 1952) |
|  |
| 1.19 Inactivation rate constant for gating variable *m* at membrane potential *v* (Hodgkin & Huxley 1952) |
|  |
| 1.20 Activation rate constant for gating variable *n* at membrane potential *v* (Hodgkin & Huxley 1952) |
|  |
| 1.21 Inactivation rate constant for gating variable *n* at membrane potential *v* (Hodgkin & Huxley 1952) |
|  |
| 1.22 Activation rate constant for gating variable *h* at membrane potential *v* (Hodgkin & Huxley 1952) |
|  |
| 1.23 Activation rate constant for gating variable *h* at membrane potential *v* (Hodgkin & Huxley 1952) |
|  |
| 1.24 Time constant for gating variable *m* (Hodgkin & Huxley 1952) |
|  |
| 1.25 Time constant for gating variable *h* (Hodgkin & Huxley 1952) |
|  |
| 1.26 Time constant for gating variable *n* (Hodgkin & Huxley 1952) |
|  |
| 1.27 Steady state value of gating variable *m* (Hodgkin & Huxley 1952) |
|  |
| 1.28 Steady state value of gating variable *h* (Hodgkin & Huxley 1952) |
|  |
| 1.29 Steady state value of gating variable *n* (Hodgkin & Huxley 1952) |
|  |
| 1.30 Update rule for gating variable *m* (Hodgkin & Huxley 1952) |
|  |
| 1.31 Update rule for gating variable *h* (Hodgkin & Huxley 1952) |
|  |
| 1.32 Update rule for gating variable *n* (Hodgkin & Huxley 1952) |
|  |
| 1.33 Change of [*Ca*2+] in neuron (Lee et al., 2009) |
|  |
| 1.34 Release probability of vesicles (Lee et al., 2009) |
|  |
| 1.35 Recovery rate from empty to releasable state (Lee et al., 2009) |
|  |
| 1.36 Ratio of releasable vesicles (Lee et al., 2009) |
|  |
| 1.37 Synaptic glutamate concentration (Modified fron Lee et al., 2009) |
|  |
| 1.38 Neuron Vmax hexokinase (Mangia et al.,2009) |
|  |
| 1.39 Neuron Vmax lactate consumption (Mangia et al.,2009) |
|  |
| 1.40 Neuronal lactate oxidation (Mangia et al.,2009) |
|  |
| 1.41 Neuronal glucose oxidation (Mangia et al.,2009) |
|  |
| 1.42 Neuronal glucose utilization (Mangia et al.,2009) |
|  |
| 1.43 Conversion of neuronal glucose to lactate (Mangia et al.,2009) |
|  |
| 1.44 Change in neuronal glucose concentration (Mangia et al.,2009) |
|  |
| 1.45 Change in neuronal lactate concentration (Mangia et al.,2009) |
|  |
| 1.46 Rate of ATP production |
|  |
| 1.47 Change in neuronal ATP concentration |
|  |
| S.A.2. Astrocyte |
| 1.48 Ratio of bound to total glutamate receptors in synapse (Bennett et al., 2008) |
|  |
| 1.49 Ratio of activated to total G-protein receptors (Bennett et al., 2008) |
|  |
| 1.50 Change in *IP3* concentration in astrocyte (Modified from Bennett et al., 2008) |
|  |
| 1.51 Rate of *Ca*2+ concentration change due to pump uptake into ER (Bennett et al., 2008) |
|  |
| 1.52 Gating variable of *Ca*2+ activated *IP*3 receptors (Bennett et al., 2008) |
|  |
| 1.53 Rate of *Ca*2+ concentration change due to release through *IP*3 channels (Bennett et al., 2008) |
|  |
| 1.54 Rate of *Ca*2+ concentration change due to leakage from ER (Bennett et al., 2008) |
|  |
| 1.55 Cytosolic *Ca*2+ concentration in astrocyte (Bennett et al., 2008) |
|  |
| 1.56 Rate of production of EET (Modified from Bennett et al., 2008) |
|  |
| 1.57 Astrocytic Vmax lactate consumption (Mangia et al.,2009) |
|  |
| 1.58 Astrocytic Vmax hexokinase (Mangia et al.,2009) |
|  |
| 1.59 Astrocytic lactate oxidation (Mangia et al., 2009) |
|  |
| 1.60 Astrocytic glucose oxidation (Mangia et al., 2009) |
|  |
| 1.60 Astrocytic glucose oxidation (Mangia et al., 2009) |
| 1.61 Astrocytic glucose utilization (Mangia et al., 2009) |
|  |
| 1.62 Conversion of astrocytic glucose to lactate (Mangia et al.,2009) |
|  |
| 1.63 Change in astrocytic glucose concentration (Mangia et al.,2009) |
|  |
| 1.64 Change in astrocytic lactate concentration (Mangia et al.,2009) |
|  |
| S.A.3. Vessel |
| 1.65 Smooth muscle membrane potential |
|  |
| 1.66 Change in vessel radius |
|  |
| 1.67 Glucose flux from blood |
|  |
| 1.68 Lactate flux from blood |
|  |
| 1.69 Glucose flux from blood to endothelium (Mangia et al., 2009) |
|  |
| 1.70 Glucose flux from endothelium to basal lamina (Mangia et al., 2009) |
|  |
| 1.71 Lactate flux from blood to endothelium (Mangia et al., 2009) |
|  |
| 1.72 Lactate flux from endothelium to basal lamina (Mangia et al., 2009) |
|  |
| 1.73 Glucose flux through endothelium (Mangia et al., 2009) |
|  |
| 1.74 Glucose flux through basal lamina (Mangia et al., 2009) |
|  |
| 1.75 Lactate flux through endothelium (Mangia et al., 2009) |
|  |
| 1.76 Lactate flux through basal lamina (Mangia et al., 2009) |
|  |
| S.A.4. Interstitium |
| 1.77 Buffering of interstitial *K*+ |
|  |
| 1.78 Change in interstitial *K*+ concentration (Kager et al., 2000) |
|  |
| 1.79 Change in interstitial *Na*+ concentration (Kager et al., 2000) |
|  |
| 1.80 Glucose flux through interstitial space (Mangia et al., 2009) |
|  |
| 1.81 Lactate flux through interstitial space (Mangia et al., 2009) |
|  |
| 1.82 Glucose flux from basal lamina to astrocyte (Mangia et al., 2009) |
|  |
| 1.83 Glucose flux from astrocyte to interstitial space (Mangia et al., 2009) |
|  |
| 1.84 Glucose flux from interstitial space to neuron (Mangia et al., 2009) |
|  |
| 1.85 Glucose flux from basal lamina to interstitial space (Mangia et al., 2009) |
|  |
| 1.86 Lactate flux from basal lamina to astrocyte (Mangia et al., 2009) |
|  |
| 1.87 Lactate flux from astrocyte to interstitial space (Mangia et al., 2009) |
|  |
| 1.88 Lactate flux from interstitial space to neuron (Mangia et al., 2009) |
|  |
| 1.89 Lactate flux from basal lamina to interstitial space (Mangia et al., 2009) |
|  |

# APPENDIX S.B

# List of Constants

|  | Peak Potassium Conductance | Hodgkin & Huxley, 1952 |
| --- | --- | --- |
|  | Peak Sodium Conductance | Hodgkin & Huxley, 1952 |
|  | Peak Leakage Conductance | Hodgkin & Huxley, 1952 |
|  | Leakage Membrane Potential | Hodgkin & Huxley, 1952 |
|  | Membrane Capacitance | Hodgkin & Huxley, 1952 |
|  |  | Kager et al. 2000 |
|  |  | Kager et al. 2000 |
|  | Maximum Na/K ATPase Pump Current | Kager et al. 2000 |
|  | Intracellular Calcium Concentration Gain per Action Potential | Lee et al. 2009 |
|  |  | Fitted to Kager et al. 2000 |
|  |  | Fitted to Lee et al. 2009 |
|  | Faraday’s Constant |  |
|  | Calcium Sensitivity Regarding Transmitter Release | Lee et al. 2009 |
|  | Maximum Probability of Release | Lee et al. 2009 |
|  | Initial Recovery Rate of Synaptic Vesicle from Empty to Releasable State | Lee et al. 2009 |
|  | Maximum Recovery Rate of Synaptic Vesicle from Empty to Releasable State | Lee et al. 2009 |
|  | Calcium Sensitivity Regarding Transmitter Release | Lee et al. 2009 |
|  | Total Surface Area of Neuron | Kager et al. 2000 |
|  | Total Internal Volume of Neuron | Kager et al. 2000 |
|  |  | Mangia et al. 2009 |
|  |  | Mangia et al. 2009 |
|  | Dissociation Constant | Bennett et al. 2008 |
|  | G-Protein Dissociation Constant | Bennett et al. 2008 |
|  | IP3 Degradation Rate | Bennett et al. 2008 |
|  | Ca2+ concentration in ER | Bennett et al. 2008 |
|  | Maximum Pumping Rate of Ca2+ into ER | Bennett et al. 2008 |
|  | Pump Dissociation Constant | Bennett et al. 2008 |
|  | Maximum Ca2+ Channel Current | Bennett et al. 2008 |
|  | IP3 Channel Kinetic Parameter | Bennett et al. 2008 |
|  | IP3 Channel Kinetic Parameter | Bennett et al. 2008 |
|  | IP3 Channel Kinetic Parameter | Bennett et al. 2008 |
|  | Minimum Ca2+ Concentration for EET Production | Bennett et al. 2008 |
|  | Endogenous Buffer Parameter | Bennett et al. 2008 |
|  | IP3 Channel Kinetic Parameter | Bennett et al. 2008 |
|  | Determined by Steady State Balance Condition | Bennett et al. 2008 |
|  |  | Mangia et al. 2009 |
|  |  | Mangia et al. 2009 |
|  | EET Production Rate | Bennett et al. 2008 |
|  |  | Mangia et al. 2009 |
| (#) |  | Mangia et al. 2009 |
|  |  | Mangia et al. 2009 |
|  |  | Mangia et al. 2009 |
|  |  | Mangia et al. 2009 |
| mM | Serum Glucose Concentration | Mangia et al. 2009 |
|  | Minimum Vessel Radius |  |
|  | Maximum Vessel Radius |  |
|  |  | Mangia et al. 2009 |
|  | Serum Lactate Concentration | Mangia et al. 2009 |
| (#) |  | Mangia et al. 2009 |
|  |  | Mangia et al. 2009 |
|  |  | Mangia et al. 2009 |
|  |  | Mangia et al. 2009 |
|  |  | Mangia et al. 2009 |
|  |  | Mangia et al. 2009 |
|  |  | Mangia et al. 2009 |
|  |  | Mangia et al. 2009 |
|  |  | Mangia et al. 2009 |
| µL | Extracellular Volume | Kager et al. 2000 |
|  |  | Kager et al. 2000 |
|  |  | Kager et al. 2000 |
|  | Extracellular Na+ Concentration |  |
|  | Extracellular K+ Concentration |  |
|  | Neuronal Cytosolic Na+ Concentration |  |
|  | Neuronal Cytosolic K+ Concentration |  |
|  | Initial Probability of Activation of Na+ Ion Channel | Hodgkin & Huxley, 1952 |
|  | Initial Probability of Inactivation of Na+ Ion Channel | Hodgkin & Huxley, 1952 |
|  | Initial Probability of Activation of K+ Ion Channel | Hodgkin & Huxley, 1952 |
|  | Resting Membrane Potential of Neuron | Hodgkin & Huxley, 1952 |
|  | Initial Neuronal Ca2+ Concentration | Lee et al. 2009 |
|  | Initial Neuronal ATP Concentration unless mentioned otherwise |  |
| mM | Initial K+ Buffer Capacity of Astrocyte | Kager et al. 2000 |
| mM | Initial K+ Buffered | Kager et al. 2000 |
| (#) | Remaining Ratio of Vesicles Releasable | Lee et al. 2009 |
|  | Time constant for clearance of synaptic glutamate | Clements et al. 1992 |
|  | Initial Synaptic Glutamate Concentration | Bennett et al. 2008 |
|  | Inflow Calcium Current as Dirac Delta Function | Kager et al. 2000 |
|  | IP3 Production Rate | Bennett et al. 2008 |
|  | Initial Astrocytic IP3 Concentration | Bennett et al. 2008 |
|  | Initial Astrocytic Ca2+ Concentration | Bennett et al. 2008 |
|  | Initial Probability of Ca2+ Occupying its Inhibitory Binding Site | Bennett et al. 2008 |
|  | Initial Extracellular EET Concentration | Bennett et al. 2008 |
|  |  | Bennett et al. 2005 |
| L | Interstitial Volume | Mangia et al. 2009 |
| L | Neuronal Volume | Mangia et al. 2009 |
| L | Basal Lamina Volume | Mangia et al. 2009 |
| L | Astrocyte Volume | Mangia et al. 2009 |
| L | Endothelium Volume | Mangia et al. 2009 |
|  |  | Mangia et al. 2009 |
|  |  | Mangia et al. 2009 |
|  |  | Mangia et al. 2009 |
|  |  | Mangia et al. 2009 |
|  |  | Mangia et al. 2009 |
|  |  | Mangia et al. 2009 |
|  |  | Mangia et al. 2009 |
|  |  | Mangia et al. 2009 |
|  |  | Mangia et al. 2009 |
|  |  | Mangia et al. 2009 |
|  |  | Mangia et al. 2009 |
|  |  | Mangia et al. 2009 |
|  |  | Mangia et al. 2009 |
|  |  | Mangia et al. 2009 |
|  |  | Mangia et al. 2009 |
|  |  | Mangia et al. 2009 |
|  |  | Mangia et al. 2009 |
|  |  | Mangia et al. 2009 |
|  |  | Mangia et al. 2009 |
|  |  | Mangia et al. 2009 |
|  |  | Mangia et al. 2009 |
| mM | Initial Concentration of Glucose in Interstitium | Mangia et al. 2009 |
| mM | Initial Concentration of Lactate in Interstitium | Mangia et al. 2009 |
| mM | Initial Concentration of Glucose in Neuron | Mangia et al. 2009 |
| mM | Initial Concentration of Lactate in Neuron | Mangia et al. 2009 |
| mM | Initial Concentration of Glucose in Astrocyte | Mangia et al. 2009 |
| mM | Initial Concentration of Lactate in Astrocyte | Mangia et al. 2009 |
| mM | Initial Concentration of Glucose in Endothelium | Mangia et al. 2009 |
| mM | Initial Concentration of Glucose in Basal Membrane | Mangia et al. 2009 |
| mM | Initial Concentration of Lactate in Endothelium | Mangia et al. 2009 |
